# Supplementary material for: Distinct neural mechanisms underlie subjective and objective recollection and guide memory-based decision making
Source: eLife. 2021 Mar 9;10:e62520. doi: 10.7554/eLife.62520 (PMC7943194; doi:10.7554/eLife.62520)
Supplement: Figure 2—source data 2. [file elife-62520-fig2-data2.csv]

Subject	cond	accuracy	remember_prop
3007	aa	0	0.103448275862069
3008	aa	0	0.111111111111111
3010	aa	0	0.2
3011	aa	0	0.117647058823529
3012	aa	0	0.179487179487179
3013	aa	0	0.305555555555556
3014	aa	0	0.0967741935483871
3015	aa	0	0
3017	aa	0	0.256410256410256
3018	aa	0	0
3019	aa	0	0.0333333333333333
3020	aa	0	0.1
3021	aa	0	0.15
3022	aa	0	0.0454545454545455
3023	aa	0	0.147058823529412
3025	aa	0	0.12
3026	aa	0	0.277777777777778
3027	aa	0	0.0689655172413793
3028	aa	0	0.333333333333333
3029	aa	0	0.451612903225806
3034	aa	0	0.0606060606060606
3035	aa	0	0
3040	aa	0	0.0810810810810811
3101	aa	0	0.0697674418604651
3102	aa	0	0.193548387096774
3103	aa	0	0.151515151515152
3104	aa	0	0.264150943396226
3105	aa	0	0.0857142857142857
3201	aa	0	0.125
3007	ab	0	0.09375
3008	ab	0	0.297872340425532
3010	ab	0	0.339622641509434
3011	ab	0	0.352941176470588
3012	ab	0	0.697674418604651
3013	ab	0	0.707317073170732
3014	ab	0	0.4
3015	ab	0	0.310344827586207
3017	ab	0	0.24390243902439
3018	ab	0	0.258064516129032
3019	ab	0	0.421052631578947
3020	ab	0	0.365853658536585
3021	ab	0	0.294117647058824
3022	ab	0	0.172413793103448
3023	ab	0	0.404761904761905
3025	ab	0	0.275
3026	ab	0	0.395833333333333
3027	ab	0	0.205128205128205
3028	ab	0	0.541666666666667
3029	ab	0	0.761904761904762
3034	ab	0	0.568181818181818
3035	ab	0	0.239130434782609
3040	ab	0	0.613636363636364
3101	ab	0	0.0238095238095238
3102	ab	0	0.333333333333333
3103	ab	0	0.3125
3104	ab	0	0.755555555555556
3105	ab	0	0.450980392156863
3201	ab	0	0.363636363636364
3007	aa	1	0.144578313253012
3008	aa	1	0.217948717948718
3010	aa	1	0.333333333333333
3011	aa	1	0.223404255319149
3012	aa	1	0.452054794520548
3013	aa	1	0.540540540540541
3014	aa	1	0.30379746835443
3015	aa	1	0.25
3017	aa	1	0.287671232876712
3018	aa	1	0.0972222222222222
3019	aa	1	0.214285714285714
3020	aa	1	0.292682926829268
3021	aa	1	0.354838709677419
3022	aa	1	0.213333333333333
3023	aa	1	0.3
3025	aa	1	0.36046511627907
3026	aa	1	0.347368421052632
3027	aa	1	0.317647058823529
3028	aa	1	0.5
3029	aa	1	0.670886075949367
3034	aa	1	0.189189189189189
3035	aa	1	0.218390804597701
3040	aa	1	0.131578947368421
3101	aa	1	0.0714285714285714
3102	aa	1	0.222222222222222
3103	aa	1	0.397435897435897
3104	aa	1	0.457627118644068
3105	aa	1	0.227848101265823
3201	aa	1	0.359550561797753
3007	ab	1	0.3
3008	ab	1	0.25
3010	ab	1	0.55
3011	ab	1	0.333333333333333
3012	ab	1	0.549295774647887
3013	ab	1	0.708333333333333
3014	ab	1	0.578125
3015	ab	1	0.273809523809524
3017	ab	1	0.506849315068493
3018	ab	1	0.4375
3019	ab	1	0.413333333333333
3020	ab	1	0.493150684931507
3021	ab	1	0.463917525773196
3022	ab	1	0.328767123287671
3023	ab	1	0.402777777777778
3025	ab	1	0.418918918918919
3026	ab	1	0.409090909090909
3027	ab	1	0.213333333333333
3028	ab	1	0.544444444444444
3029	ab	1	0.8
3034	ab	1	0.594202898550725
3035	ab	1	0.375
3040	ab	1	0.536231884057971
3101	ab	1	0.126760563380282
3102	ab	1	0.394366197183099
3103	ab	1	0.515151515151515
3104	ab	1	0.782608695652174
3105	ab	1	0.507936507936508
3201	ab	1	0.604938271604938
