# Supplementary material for: Distinct neural mechanisms underlie subjective and objective recollection and guide memory-based decision making
Source: eLife. 2021 Mar 9;10:e62520. doi: 10.7554/eLife.62520 (PMC7943194; doi:10.7554/eLife.62520)
Supplement: Figure 2—source data 3. [file elife-62520-fig2-data3.csv]

Subject	cond	accuracy	recollection	select_prop
3007	aa	0	F	0.08
3008	aa	0	F	0.28125
3010	aa	0	F	0.166666666666667
3011	aa	0	F	0.307692307692308
3012	aa	0	F	0.25
3013	aa	0	F	0.0869565217391304
3014	aa	0	F	0.423076923076923
3015	aa	0	F	0.16
3017	aa	0	F	0.344827586206897
3018	aa	0	F	0.0588235294117647
3019	aa	0	F	0.178571428571429
3020	aa	0	F	0.407407407407407
3021	aa	0	F	0.0625
3022	aa	0	F	0.2
3023	aa	0	F	0.482758620689655
3025	aa	0	F	0.363636363636364
3026	aa	0	F	0.230769230769231
3027	aa	0	F	0.111111111111111
3028	aa	0	F	0.0833333333333333
3029	aa	0	F	0.125
3034	aa	0	F	0.0645161290322581
3035	aa	0	F	0.0454545454545455
3040	aa	0	F	0.147058823529412
3101	aa	0	F	0.405405405405405
3102	aa	0	F	0.541666666666667
3103	aa	0	F	0.75
3104	aa	0	F	0.657894736842105
3105	aa	0	F	0.7
3201	aa	0	F	0.857142857142857
3007	ab	0	F	0.448275862068966
3008	ab	0	F	0.363636363636364
3010	ab	0	F	0.142857142857143
3011	ab	0	F	0.727272727272727
3012	ab	0	F	0.416666666666667
3013	ab	0	F	0.3
3014	ab	0	F	0.4
3015	ab	0	F	0.25
3017	ab	0	F	0.379310344827586
3018	ab	0	F	0.565217391304348
3019	ab	0	F	0.454545454545455
3020	ab	0	F	0.538461538461538
3021	ab	0	F	0.0909090909090909
3022	ab	0	F	0.454545454545455
3023	ab	0	F	0.666666666666667
3025	ab	0	F	0.344827586206897
3026	ab	0	F	0.285714285714286
3027	ab	0	F	0.32258064516129
3028	ab	0	F	0.272727272727273
3029	ab	0	F	0.1
3034	ab	0	F	0.166666666666667
3035	ab	0	F	0.294117647058824
3040	ab	0	F	0.470588235294118
3101	ab	0	F	0.421052631578947
3102	ab	0	F	0.461538461538462
3103	ab	0	F	0.625
3104	ab	0	F	0.636363636363636
3105	ab	0	F	0.5
3201	ab	0	F	0.6
3007	aa	1	F	0.585714285714286
3008	aa	1	F	0.639344262295082
3010	aa	1	F	0.340909090909091
3011	aa	1	F	0.777777777777778
3012	aa	1	F	0.526315789473684
3013	aa	1	F	0.107142857142857
3014	aa	1	F	0.581818181818182
3015	aa	1	F	0.439393939393939
3017	aa	1	F	0.5
3018	aa	1	F	0.421875
3019	aa	1	F	0.338709677419355
3020	aa	1	F	0.448275862068966
3021	aa	1	F	0.3
3022	aa	1	F	0.482142857142857
3023	aa	1	F	0.690909090909091
3025	aa	1	F	0.584905660377358
3026	aa	1	F	0.413793103448276
3027	aa	1	F	0.379310344827586
3028	aa	1	F	0.319148936170213
3029	aa	1	F	0.230769230769231
3034	aa	1	F	0.172413793103448
3035	aa	1	F	0.242424242424242
3040	aa	1	F	0.46969696969697
3101	aa	1	F	0.296875
3102	aa	1	F	0.301587301587302
3103	aa	1	F	0.521739130434783
3104	aa	1	F	0.65625
3105	aa	1	F	0.573770491803279
3201	aa	1	F	0.527272727272727
3007	ab	1	F	0.709090909090909
3008	ab	1	F	0.574468085106383
3010	ab	1	F	0.36
3011	ab	1	F	0.769230769230769
3012	ab	1	F	0.53125
3013	ab	1	F	0.315789473684211
3014	ab	1	F	0.576923076923077
3015	ab	1	F	0.672131147540984
3017	ab	1	F	0.4
3018	ab	1	F	0.75
3019	ab	1	F	0.454545454545455
3020	ab	1	F	0.540540540540541
3021	ab	1	F	0.346153846153846
3022	ab	1	F	0.714285714285714
3023	ab	1	F	0.833333333333333
3025	ab	1	F	0.651162790697674
3026	ab	1	F	0.631578947368421
3027	ab	1	F	0.482142857142857
3028	ab	1	F	0.4
3029	ab	1	F	0.285714285714286
3034	ab	1	F	0.142857142857143
3035	ab	1	F	0.325
3040	ab	1	F	0.645161290322581
3101	ab	1	F	0.25
3102	ab	1	F	0.162790697674419
3103	ab	1	F	0.5625
3104	ab	1	F	0.466666666666667
3105	ab	1	F	0.580645161290323
3201	ab	1	F	0.233333333333333
3007	aa	0	R	0.666666666666667
3008	aa	0	R	0.25
3010	aa	0	R	1
3011	aa	0	R	1
3012	aa	0	R	0.333333333333333
3013	aa	0	R	0.8
3014	aa	0	R	0.666666666666667
3017	aa	0	R	0.6
3019	aa	0	R	1
3020	aa	0	R	0.666666666666667
3021	aa	0	R	0.333333333333333
3022	aa	0	R	1
3023	aa	0	R	0.2
3025	aa	0	R	0.333333333333333
3026	aa	0	R	1
3027	aa	0	R	0.5
3028	aa	0	R	0.333333333333333
3029	aa	0	R	0.357142857142857
3034	aa	0	R	0
3040	aa	0	R	0
3101	aa	0	R	0.5
3102	aa	0	R	0
3103	aa	0	R	0.4
3104	aa	0	R	0.307692307692308
3105	aa	0	R	0
3201	aa	0	R	0.666666666666667
3007	ab	0	R	0.666666666666667
3008	ab	0	R	0.642857142857143
3010	ab	0	R	0.888888888888889
3011	ab	0	R	0.727272727272727
3012	ab	0	R	0.423076923076923
3013	ab	0	R	0.857142857142857
3014	ab	0	R	0.777777777777778
3015	ab	0	R	0.666666666666667
3017	ab	0	R	0.5
3018	ab	0	R	0.5
3019	ab	0	R	0.928571428571429
3020	ab	0	R	0.928571428571429
3021	ab	0	R	0.4
3022	ab	0	R	1
3023	ab	0	R	1
3025	ab	0	R	0.818181818181818
3026	ab	0	R	0.894736842105263
3027	ab	0	R	0.75
3028	ab	0	R	0.230769230769231
3029	ab	0	R	0.766666666666667
3034	ab	0	R	0.875
3035	ab	0	R	0.625
3040	ab	0	R	0.888888888888889
3101	ab	0	R	0
3102	ab	0	R	0
3103	ab	0	R	0.357142857142857
3104	ab	0	R	0.382352941176471
3105	ab	0	R	0.130434782608696
3201	ab	0	R	0
3007	aa	1	R	1
3008	aa	1	R	0.882352941176471
3010	aa	1	R	0.916666666666667
3011	aa	1	R	0.952380952380952
3012	aa	1	R	0.6875
3013	aa	1	R	0.894736842105263
3014	aa	1	R	0.916666666666667
3015	aa	1	R	1
3017	aa	1	R	0.952380952380952
3018	aa	1	R	1
3019	aa	1	R	0.944444444444444
3020	aa	1	R	0.875
3021	aa	1	R	0.939393939393939
3022	aa	1	R	1
3023	aa	1	R	0.857142857142857
3025	aa	1	R	0.793103448275862
3026	aa	1	R	1
3027	aa	1	R	0.962962962962963
3028	aa	1	R	0.851063829787234
3029	aa	1	R	0.807692307692308
3034	aa	1	R	0.928571428571429
3035	aa	1	R	1
3040	aa	1	R	0.9
3101	aa	1	R	0.25
3102	aa	1	R	0
3103	aa	1	R	0.0967741935483871
3104	aa	1	R	0.0769230769230769
3105	aa	1	R	0.111111111111111
3201	aa	1	R	0.03125
3007	ab	1	R	0.954545454545455
3008	ab	1	R	0.875
3010	ab	1	R	0.870967741935484
3011	ab	1	R	0.958333333333333
3012	ab	1	R	0.5
3013	ab	1	R	0.94
3014	ab	1	R	1
3015	ab	1	R	0.956521739130435
3017	ab	1	R	0.916666666666667
3018	ab	1	R	0.942857142857143
3019	ab	1	R	0.967741935483871
3020	ab	1	R	0.942857142857143
3021	ab	1	R	0.911111111111111
3022	ab	1	R	0.826086956521739
3023	ab	1	R	0.962962962962963
3025	ab	1	R	0.866666666666667
3026	ab	1	R	1
3027	ab	1	R	0.9375
3028	ab	1	R	0.673469387755102
3029	ab	1	R	0.75
3034	ab	1	R	0.95
3035	ab	1	R	0.958333333333333
3040	ab	1	R	0.945945945945946
3101	ab	1	R	0
3102	ab	1	R	0.0357142857142857
3103	ab	1	R	0.0882352941176471
3104	ab	1	R	0.0943396226415094
3105	ab	1	R	0.225806451612903
3201	ab	1	R	0.0408163265306122
