# Supplementary material for: Distinct neural mechanisms underlie subjective and objective recollection and guide memory-based decision making
Source: eLife. 2021 Mar 9;10:e62520. doi: 10.7554/eLife.62520 (PMC7943194; doi:10.7554/eLife.62520)
Supplement: Figure 3—source data 1. [file elife-62520-fig3-data1.csv]

Subject	roi	contrast	psc
3007	precuneus	aa_r_phase1	0.08986
3007	precuneus	aa_f_phase1	0.2117
3007	precuneus	ab_r_phase1	0.297
3007	precuneus	ab_f_phase1	0.2609
3007	spl	aa_r_phase1	0.04971
3007	spl	aa_f_phase1	0.07762
3007	spl	ab_r_phase1	0.04094
3007	spl	ab_f_phase1	0.007223
3007	dlpfc_acc	aa_r_phase1	0.06108
3007	dlpfc_acc	aa_f_phase1	0.1026
3007	dlpfc_acc	ab_r_phase1	0.145
3007	dlpfc_acc	ab_f_phase1	0.1165
3008	precuneus	aa_r_phase1	-0.2959
3008	precuneus	aa_f_phase1	-0.1842
3008	precuneus	ab_r_phase1	0.122
3008	precuneus	ab_f_phase1	-0.1427
3008	spl	aa_r_phase1	-0.1285
3008	spl	aa_f_phase1	-0.005457
3008	spl	ab_r_phase1	-0.02389
3008	spl	ab_f_phase1	-0.04224
3008	dlpfc_acc	aa_r_phase1	-0.08467
3008	dlpfc_acc	aa_f_phase1	0.02695
3008	dlpfc_acc	ab_r_phase1	0.09809
3008	dlpfc_acc	ab_f_phase1	0.1056
3010	precuneus	aa_r_phase1	0.2685
3010	precuneus	aa_f_phase1	0.1472
3010	precuneus	ab_r_phase1	0.1965
3010	precuneus	ab_f_phase1	0.03021
3010	spl	aa_r_phase1	0.01613
3010	spl	aa_f_phase1	-0.000853
3010	spl	ab_r_phase1	-0.09541
3010	spl	ab_f_phase1	-0.08657
3010	dlpfc_acc	aa_r_phase1	0.3055
3010	dlpfc_acc	aa_f_phase1	0.1049
3010	dlpfc_acc	ab_r_phase1	0.1219
3010	dlpfc_acc	ab_f_phase1	0.1909
3011	precuneus	aa_r_phase1	0.04615
3011	precuneus	aa_f_phase1	-0.05153
3011	precuneus	ab_r_phase1	0.1256
3011	precuneus	ab_f_phase1	-0.02422
3011	spl	aa_r_phase1	0.02405
3011	spl	aa_f_phase1	-0.04426
3011	spl	ab_r_phase1	-0.03466
3011	spl	ab_f_phase1	-0.09834
3011	dlpfc_acc	aa_r_phase1	0.1565
3011	dlpfc_acc	aa_f_phase1	0.06674
3011	dlpfc_acc	ab_r_phase1	0.1256
3011	dlpfc_acc	ab_f_phase1	0.1175
3012	precuneus	aa_r_phase1	-0.1068
3012	precuneus	aa_f_phase1	-0.0936
3012	precuneus	ab_r_phase1	0.02318
3012	precuneus	ab_f_phase1	-0.03351
3012	spl	aa_r_phase1	-0.1184
3012	spl	aa_f_phase1	-0.02597
3012	spl	ab_r_phase1	-0.1164
3012	spl	ab_f_phase1	0.02157
3012	dlpfc_acc	aa_r_phase1	0.05003
3012	dlpfc_acc	aa_f_phase1	-0.03462
3012	dlpfc_acc	ab_r_phase1	0.04911
3012	dlpfc_acc	ab_f_phase1	-0.01156
3013	precuneus	aa_r_phase1	-0.07677
3013	precuneus	aa_f_phase1	-0.2988
3013	precuneus	ab_r_phase1	-0.009935
3013	precuneus	ab_f_phase1	-0.1136
3013	spl	aa_r_phase1	-0.07631
3013	spl	aa_f_phase1	-0.1073
3013	spl	ab_r_phase1	-0.08818
3013	spl	ab_f_phase1	-0.0614
3013	dlpfc_acc	aa_r_phase1	0.1347
3013	dlpfc_acc	aa_f_phase1	-0.1894
3013	dlpfc_acc	ab_r_phase1	0.1257
3013	dlpfc_acc	ab_f_phase1	0.1091
3014	precuneus	aa_r_phase1	-0.09109
3014	precuneus	aa_f_phase1	-0.1196
3014	precuneus	ab_r_phase1	0.008362
3014	precuneus	ab_f_phase1	0.1573
3014	spl	aa_r_phase1	-0.2054
3014	spl	aa_f_phase1	-0.1609
3014	spl	ab_r_phase1	-0.2795
3014	spl	ab_f_phase1	-0.1213
3014	dlpfc_acc	aa_r_phase1	-0.01568
3014	dlpfc_acc	aa_f_phase1	-0.1395
3014	dlpfc_acc	ab_r_phase1	0.05549
3014	dlpfc_acc	ab_f_phase1	0.09949
3015	precuneus	aa_r_phase1	-0.05177
3015	precuneus	aa_f_phase1	0.02671
3015	precuneus	ab_r_phase1	-0.04624
3015	precuneus	ab_f_phase1	0.03043
3015	spl	aa_r_phase1	-0.0923
3015	spl	aa_f_phase1	-0.03895
3015	spl	ab_r_phase1	-0.1831
3015	spl	ab_f_phase1	-0.1313
3015	dlpfc_acc	aa_r_phase1	0.0792
3015	dlpfc_acc	aa_f_phase1	0.04583
3015	dlpfc_acc	ab_r_phase1	0.1067
3015	dlpfc_acc	ab_f_phase1	0.07062
3017	precuneus	aa_r_phase1	0.1216
3017	precuneus	aa_f_phase1	-0.08608
3017	precuneus	ab_r_phase1	-0.008908
3017	precuneus	ab_f_phase1	-0.08901
3017	spl	aa_r_phase1	0.05188
3017	spl	aa_f_phase1	0.02526
3017	spl	ab_r_phase1	-0.09558
3017	spl	ab_f_phase1	-0.06919
3017	dlpfc_acc	aa_r_phase1	0.101
3017	dlpfc_acc	aa_f_phase1	-0.05215
3017	dlpfc_acc	ab_r_phase1	0.002363
3017	dlpfc_acc	ab_f_phase1	-0.06608
3018	precuneus	aa_r_phase1	0.04894
3018	precuneus	aa_f_phase1	-0.05648
3018	precuneus	ab_r_phase1	0.06266
3018	precuneus	ab_f_phase1	0.04097
3018	spl	aa_r_phase1	-0.08832
3018	spl	aa_f_phase1	-0.07327
3018	spl	ab_r_phase1	-0.1795
3018	spl	ab_f_phase1	-0.1653
3018	dlpfc_acc	aa_r_phase1	0.05291
3018	dlpfc_acc	aa_f_phase1	-0.04093
3018	dlpfc_acc	ab_r_phase1	-0.01466
3018	dlpfc_acc	ab_f_phase1	0.06118
3019	precuneus	aa_r_phase1	0.06262
3019	precuneus	aa_f_phase1	-0.1607
3019	precuneus	ab_r_phase1	0.1155
3019	precuneus	ab_f_phase1	-0.02842
3019	spl	aa_r_phase1	-0.005524
3019	spl	aa_f_phase1	-0.05167
3019	spl	ab_r_phase1	-0.08372
3019	spl	ab_f_phase1	-0.08827
3019	dlpfc_acc	aa_r_phase1	0.2096
3019	dlpfc_acc	aa_f_phase1	0.1104
3019	dlpfc_acc	ab_r_phase1	0.3352
3019	dlpfc_acc	ab_f_phase1	0.2438
3020	precuneus	aa_r_phase1	0.05227
3020	precuneus	aa_f_phase1	-0.06802
3020	precuneus	ab_r_phase1	0.06008
3020	precuneus	ab_f_phase1	0.04134
3020	spl	aa_r_phase1	-0.1083
3020	spl	aa_f_phase1	-0.1529
3020	spl	ab_r_phase1	-0.1975
3020	spl	ab_f_phase1	-0.1791
3020	dlpfc_acc	aa_r_phase1	0.1428
3020	dlpfc_acc	aa_f_phase1	0.07929
3020	dlpfc_acc	ab_r_phase1	0.1077
3020	dlpfc_acc	ab_f_phase1	0.09495
3021	precuneus	aa_r_phase1	-0.08004
3021	precuneus	aa_f_phase1	-0.005988
3021	precuneus	ab_r_phase1	-0.05343
3021	precuneus	ab_f_phase1	-0.03218
3021	spl	aa_r_phase1	-0.07958
3021	spl	aa_f_phase1	-0.01845
3021	spl	ab_r_phase1	-0.124
3021	spl	ab_f_phase1	-0.04026
3021	dlpfc_acc	aa_r_phase1	0.0569
3021	dlpfc_acc	aa_f_phase1	0.1264
3021	dlpfc_acc	ab_r_phase1	0.109
3021	dlpfc_acc	ab_f_phase1	0.1268
3022	precuneus	aa_r_phase1	-0.2923
3022	precuneus	aa_f_phase1	-0.2815
3022	precuneus	ab_r_phase1	-0.05536
3022	precuneus	ab_f_phase1	-0.2084
3022	spl	aa_r_phase1	-0.294
3022	spl	aa_f_phase1	-0.1523
3022	spl	ab_r_phase1	-0.1659
3022	spl	ab_f_phase1	-0.2555
3022	dlpfc_acc	aa_r_phase1	-0.3672
3022	dlpfc_acc	aa_f_phase1	-0.2115
3022	dlpfc_acc	ab_r_phase1	-0.05921
3022	dlpfc_acc	ab_f_phase1	-0.2751
3023	precuneus	aa_r_phase1	0.1411
3023	precuneus	aa_f_phase1	0.000323
3023	precuneus	ab_r_phase1	0.2009
3023	precuneus	ab_f_phase1	0.07582
3023	spl	aa_r_phase1	-0.02194
3023	spl	aa_f_phase1	-0.1043
3023	spl	ab_r_phase1	-0.08732
3023	spl	ab_f_phase1	-0.1163
3023	dlpfc_acc	aa_r_phase1	0.1405
3023	dlpfc_acc	aa_f_phase1	0.008267
3023	dlpfc_acc	ab_r_phase1	0.1609
3023	dlpfc_acc	ab_f_phase1	0.08095
3025	precuneus	aa_r_phase1	0.08087
3025	precuneus	aa_f_phase1	-0.1313
3025	precuneus	ab_r_phase1	-0.1424
3025	precuneus	ab_f_phase1	-0.008487
3025	spl	aa_r_phase1	0.05509
3025	spl	aa_f_phase1	-0.02598
3025	spl	ab_r_phase1	-0.1686
3025	spl	ab_f_phase1	-0.0881
3025	dlpfc_acc	aa_r_phase1	0.1488
3025	dlpfc_acc	aa_f_phase1	-0.1265
3025	dlpfc_acc	ab_r_phase1	-0.05779
3025	dlpfc_acc	ab_f_phase1	-0.06326
3026	precuneus	aa_r_phase1	0.0665
3026	precuneus	aa_f_phase1	0.0135
3026	precuneus	ab_r_phase1	0.283
3026	precuneus	ab_f_phase1	0.1498
3026	spl	aa_r_phase1	-0.01753
3026	spl	aa_f_phase1	-0.01909
3026	spl	ab_r_phase1	0.01542
3026	spl	ab_f_phase1	-0.02564
3026	dlpfc_acc	aa_r_phase1	0.1219
3026	dlpfc_acc	aa_f_phase1	0.1661
3026	dlpfc_acc	ab_r_phase1	0.3314
3026	dlpfc_acc	ab_f_phase1	0.2694
3027	precuneus	aa_r_phase1	0.1159
3027	precuneus	aa_f_phase1	-0.1987
3027	precuneus	ab_r_phase1	0.04481
3027	precuneus	ab_f_phase1	0.00231
3027	spl	aa_r_phase1	-0.04653
3027	spl	aa_f_phase1	-0.1321
3027	spl	ab_r_phase1	-0.0751
3027	spl	ab_f_phase1	-0.0233
3027	dlpfc_acc	aa_r_phase1	0.2119
3027	dlpfc_acc	aa_f_phase1	-0.0241
3027	dlpfc_acc	ab_r_phase1	0.2228
3027	dlpfc_acc	ab_f_phase1	0.2075
3028	precuneus	aa_r_phase1	0.1054
3028	precuneus	aa_f_phase1	0.01309
3028	precuneus	ab_r_phase1	0.1757
3028	precuneus	ab_f_phase1	0.03351
3028	spl	aa_r_phase1	0.04884
3028	spl	aa_f_phase1	-0.05876
3028	spl	ab_r_phase1	-0.03272
3028	spl	ab_f_phase1	-0.08705
3028	dlpfc_acc	aa_r_phase1	0.117
3028	dlpfc_acc	aa_f_phase1	0.07449
3028	dlpfc_acc	ab_r_phase1	0.1922
3028	dlpfc_acc	ab_f_phase1	0.03036
3029	precuneus	aa_r_phase1	-0.1841
3029	precuneus	aa_f_phase1	-0.2225
3029	precuneus	ab_r_phase1	-0.07411
3029	precuneus	ab_f_phase1	-0.0859
3029	spl	aa_r_phase1	-0.1689
3029	spl	aa_f_phase1	-0.07924
3029	spl	ab_r_phase1	-0.1948
3029	spl	ab_f_phase1	-0.024
3029	dlpfc_acc	aa_r_phase1	0.00362
3029	dlpfc_acc	aa_f_phase1	-0.1012
3029	dlpfc_acc	ab_r_phase1	0.1055
3029	dlpfc_acc	ab_f_phase1	0.04975
3034	precuneus	aa_r_phase1	0.1631
3034	precuneus	aa_f_phase1	-0.07207
3034	precuneus	ab_r_phase1	0.09487
3034	precuneus	ab_f_phase1	-0.1375
3034	spl	aa_r_phase1	0.11
3034	spl	aa_f_phase1	0.03228
3034	spl	ab_r_phase1	-0.04731
3034	spl	ab_f_phase1	-0.06948
3034	dlpfc_acc	aa_r_phase1	0.4053
3034	dlpfc_acc	aa_f_phase1	0.09662
3034	dlpfc_acc	ab_r_phase1	0.2316
3034	dlpfc_acc	ab_f_phase1	0.05936
3035	precuneus	aa_r_phase1	-0.05283
3035	precuneus	aa_f_phase1	-0.2998
3035	precuneus	ab_r_phase1	0.09431
3035	precuneus	ab_f_phase1	-0.2495
3035	spl	aa_r_phase1	-0.1202
3035	spl	aa_f_phase1	-0.1342
3035	spl	ab_r_phase1	-0.08276
3035	spl	ab_f_phase1	-0.182
3035	dlpfc_acc	aa_r_phase1	-0.1026
3035	dlpfc_acc	aa_f_phase1	-0.1477
3035	dlpfc_acc	ab_r_phase1	0.09635
3035	dlpfc_acc	ab_f_phase1	-0.09494
3040	precuneus	aa_r_phase1	0.01185
3040	precuneus	aa_f_phase1	-0.1011
3040	precuneus	ab_r_phase1	0.09222
3040	precuneus	ab_f_phase1	-0.09507
3040	spl	aa_r_phase1	-0.03513
3040	spl	aa_f_phase1	-0.01294
3040	spl	ab_r_phase1	-0.07034
3040	spl	ab_f_phase1	-0.08459
3040	dlpfc_acc	aa_r_phase1	0.1409
3040	dlpfc_acc	aa_f_phase1	0.1288
3040	dlpfc_acc	ab_r_phase1	0.1231
3040	dlpfc_acc	ab_f_phase1	0.03032
3101	precuneus	aa_r_phase1	0.1387
3101	precuneus	aa_f_phase1	0.1545
3101	precuneus	ab_r_phase1	0.2114
3101	precuneus	ab_f_phase1	0.06904
3101	spl	aa_r_phase1	-0.1291
3101	spl	aa_f_phase1	-0.2125
3101	spl	ab_r_phase1	-0.04988
3101	spl	ab_f_phase1	-0.2137
3101	dlpfc_acc	aa_r_phase1	0.06094
3101	dlpfc_acc	aa_f_phase1	0.008175
3101	dlpfc_acc	ab_r_phase1	0.1215
3101	dlpfc_acc	ab_f_phase1	-0.04227
3102	precuneus	aa_r_phase1	0.1744
3102	precuneus	aa_f_phase1	0.02569
3102	precuneus	ab_r_phase1	0.02038
3102	precuneus	ab_f_phase1	0.07848
3102	spl	aa_r_phase1	0.07469
3102	spl	aa_f_phase1	0.06886
3102	spl	ab_r_phase1	-0.06217
3102	spl	ab_f_phase1	-0.004363
3102	dlpfc_acc	aa_r_phase1	0.1169
3102	dlpfc_acc	aa_f_phase1	0.06494
3102	dlpfc_acc	ab_r_phase1	0.04276
3102	dlpfc_acc	ab_f_phase1	0.0692
3103	precuneus	aa_r_phase1	0.1713
3103	precuneus	aa_f_phase1	0.004381
3103	precuneus	ab_r_phase1	0.04407
3103	precuneus	ab_f_phase1	-0.04809
3103	spl	aa_r_phase1	0.06532
3103	spl	aa_f_phase1	0.02141
3103	spl	ab_r_phase1	-0.03095
3103	spl	ab_f_phase1	-0.05876
3103	dlpfc_acc	aa_r_phase1	0.1245
3103	dlpfc_acc	aa_f_phase1	0.04221
3103	dlpfc_acc	ab_r_phase1	0.09134
3103	dlpfc_acc	ab_f_phase1	0.06313
3104	precuneus	aa_r_phase1	-0.006289
3104	precuneus	aa_f_phase1	-0.07384
3104	precuneus	ab_r_phase1	0.1075
3104	precuneus	ab_f_phase1	-0.1139
3104	spl	aa_r_phase1	-0.05794
3104	spl	aa_f_phase1	-0.05184
3104	spl	ab_r_phase1	-0.1378
3104	spl	ab_f_phase1	-0.1674
3104	dlpfc_acc	aa_r_phase1	0.1358
3104	dlpfc_acc	aa_f_phase1	0.1467
3104	dlpfc_acc	ab_r_phase1	0.1921
3104	dlpfc_acc	ab_f_phase1	0.1105
3105	precuneus	aa_r_phase1	-0.03885
3105	precuneus	aa_f_phase1	-0.04977
3105	precuneus	ab_r_phase1	-0.006778
3105	precuneus	ab_f_phase1	0.01419
3105	spl	aa_r_phase1	0.02551
3105	spl	aa_f_phase1	0.000376
3105	spl	ab_r_phase1	-0.02415
3105	spl	ab_f_phase1	-0.04212
3105	dlpfc_acc	aa_r_phase1	0.06509
3105	dlpfc_acc	aa_f_phase1	0.0605
3105	dlpfc_acc	ab_r_phase1	0.1269
3105	dlpfc_acc	ab_f_phase1	0.1276
3201	precuneus	aa_r_phase1	-0.104
3201	precuneus	aa_f_phase1	-0.2444
3201	precuneus	ab_r_phase1	-0.09624
3201	precuneus	ab_f_phase1	-0.2719
3201	spl	aa_r_phase1	-0.03582
3201	spl	aa_f_phase1	-0.09354
3201	spl	ab_r_phase1	-0.08112
3201	spl	ab_f_phase1	-0.145
3201	dlpfc_acc	aa_r_phase1	0.1027
3201	dlpfc_acc	aa_f_phase1	0.0528
3201	dlpfc_acc	ab_r_phase1	0.1629
3201	dlpfc_acc	ab_f_phase1	0.09178
3007	ains	aa_f_phase1	0.068455
3008	ains	aa_f_phase1	0.05451
3010	ains	aa_f_phase1	0.3309
3011	ains	aa_f_phase1	0.11962
3012	ains	aa_f_phase1	0.0059265
3013	ains	aa_f_phase1	-0.2205
3014	ains	aa_f_phase1	-0.12301
3015	ains	aa_f_phase1	0.025935
3017	ains	aa_f_phase1	0.010485
3018	ains	aa_f_phase1	-0.09906
3019	ains	aa_f_phase1	0.01612
3020	ains	aa_f_phase1	-0.042045
3021	ains	aa_f_phase1	0.045435
3022	ains	aa_f_phase1	0.005901
3023	ains	aa_f_phase1	0.02845
3025	ains	aa_f_phase1	-0.1216
3026	ains	aa_f_phase1	0.07614
3027	ains	aa_f_phase1	-0.02963
3028	ains	aa_f_phase1	0.05092
3029	ains	aa_f_phase1	-0.06587
3034	ains	aa_f_phase1	-0.0244495
3035	ains	aa_f_phase1	-0.1372
3040	ains	aa_f_phase1	0.09016
3101	ains	aa_f_phase1	-0.06854
3102	ains	aa_f_phase1	0.07426
3103	ains	aa_f_phase1	-0.028525
3104	ains	aa_f_phase1	0.07603
3105	ains	aa_f_phase1	-0.074175
3201	ains	aa_f_phase1	-0.05265
3007	ains	aa_r_phase1	0.084485
3008	ains	aa_r_phase1	0.0101045
3010	ains	aa_r_phase1	0.433
3011	ains	aa_r_phase1	0.26135
3012	ains	aa_r_phase1	0.069015
3013	ains	aa_r_phase1	0.099205
3014	ains	aa_r_phase1	0.03381
3015	ains	aa_r_phase1	0.11785
3017	ains	aa_r_phase1	0.20555
3018	ains	aa_r_phase1	0.119525
3019	ains	aa_r_phase1	0.19075
3020	ains	aa_r_phase1	0.04549
3021	ains	aa_r_phase1	0.084165
3022	ains	aa_r_phase1	0.13275
3023	ains	aa_r_phase1	0.2191
3025	ains	aa_r_phase1	0.158
3026	ains	aa_r_phase1	0.18425
3027	ains	aa_r_phase1	0.139285
3028	ains	aa_r_phase1	0.23735
3029	ains	aa_r_phase1	0.0181305
3034	ains	aa_r_phase1	0.25055
3035	ains	aa_r_phase1	0.11215
3040	ains	aa_r_phase1	0.117975
3101	ains	aa_r_phase1	0.044787
3102	ains	aa_r_phase1	0.1426
3103	ains	aa_r_phase1	0.103325
3104	ains	aa_r_phase1	0.11195
3105	ains	aa_r_phase1	0.023435
3201	ains	aa_r_phase1	0.1264
3007	ains	ab_f_phase1	0.085385
3008	ains	ab_f_phase1	0.06352
3010	ains	ab_f_phase1	0.2163
3011	ains	ab_f_phase1	0.1463
3012	ains	ab_f_phase1	0.040495
3013	ains	ab_f_phase1	0.018312
3014	ains	ab_f_phase1	0.07899
3015	ains	ab_f_phase1	0.053465
3017	ains	ab_f_phase1	0.037175
3018	ains	ab_f_phase1	0.080645
3019	ains	ab_f_phase1	0.087495
3020	ains	ab_f_phase1	-0.0095325
3021	ains	ab_f_phase1	0.03737
3022	ains	ab_f_phase1	0.1583
3023	ains	ab_f_phase1	0.10704
3025	ains	ab_f_phase1	-0.03967
3026	ains	ab_f_phase1	0.2506
3027	ains	ab_f_phase1	0.0332915
3028	ains	ab_f_phase1	0.06567
3029	ains	ab_f_phase1	0.042585
3034	ains	ab_f_phase1	-0.126235
3035	ains	ab_f_phase1	-0.03989
3040	ains	ab_f_phase1	0.0359
3101	ains	ab_f_phase1	-0.120055
3102	ains	ab_f_phase1	0.08788
3103	ains	ab_f_phase1	-0.03399
3104	ains	ab_f_phase1	0.10566
3105	ains	ab_f_phase1	-0.002015
3201	ains	ab_f_phase1	-0.034343
3007	ains	ab_r_phase1	0.1396
3008	ains	ab_r_phase1	0.08541
3010	ains	ab_r_phase1	0.30275
3011	ains	ab_r_phase1	0.2365
3012	ains	ab_r_phase1	0.05924
3013	ains	ab_r_phase1	-0.03074
3014	ains	ab_r_phase1	0.107335
3015	ains	ab_r_phase1	0.137
3017	ains	ab_r_phase1	0.13063
3018	ains	ab_r_phase1	0.1286
3019	ains	ab_r_phase1	0.25175
3020	ains	ab_r_phase1	0.011555
3021	ains	ab_r_phase1	0.04726
3022	ains	ab_r_phase1	0.20375
3023	ains	ab_r_phase1	0.2132
3025	ains	ab_r_phase1	0.013988
3026	ains	ab_r_phase1	0.3921
3027	ains	ab_r_phase1	0.11725
3028	ains	ab_r_phase1	0.2661
3029	ains	ab_r_phase1	0.0308
3034	ains	ab_r_phase1	0.09561
3035	ains	ab_r_phase1	0.2606
3040	ains	ab_r_phase1	0.136005
3101	ains	ab_r_phase1	0.1991
3102	ains	ab_r_phase1	0.08605
3103	ains	ab_r_phase1	0.003551
3104	ains	ab_r_phase1	0.1488
3105	ains	ab_r_phase1	0.070105
3201	ains	ab_r_phase1	0.08971
