# Supplementary material for: Distinct neural mechanisms underlie subjective and objective recollection and guide memory-based decision making
Source: eLife. 2021 Mar 9;10:e62520. doi: 10.7554/eLife.62520 (PMC7943194; doi:10.7554/eLife.62520)
Supplement: Figure 4—source data 1. [file elife-62520-fig4-data1.csv]

Subject	roi	contrast	psc
3007	precuneus	aa_s_phase2	0.08219
3007	precuneus	aa_d_phase2	0.03769
3007	precuneus	ab_s_phase2	0.04959
3007	precuneus	ab_d_phase2	0.0323
3007	spl	aa_s_phase2	0.117
3007	spl	aa_d_phase2	-0.05917
3007	spl	ab_s_phase2	0.01135
3007	spl	ab_d_phase2	-0.0398
3007	dlpfc_acc	aa_s_phase2	0.1037
3007	dlpfc_acc	aa_d_phase2	0.07375
3007	dlpfc_acc	ab_s_phase2	0.1567
3007	dlpfc_acc	ab_d_phase2	0.1325
3008	precuneus	aa_s_phase2	0.09856
3008	precuneus	aa_d_phase2	0.03276
3008	precuneus	ab_s_phase2	0.1462
3008	precuneus	ab_d_phase2	0.2965
3008	spl	aa_s_phase2	0.09544
3008	spl	aa_d_phase2	-0.01306
3008	spl	ab_s_phase2	0.1393
3008	spl	ab_d_phase2	0.1194
3008	dlpfc_acc	aa_s_phase2	0.1058
3008	dlpfc_acc	aa_d_phase2	-0.007864
3008	dlpfc_acc	ab_s_phase2	0.1918
3008	dlpfc_acc	ab_d_phase2	0.2474
3010	precuneus	aa_s_phase2	-0.07951
3010	precuneus	aa_d_phase2	0.3905
3010	precuneus	ab_s_phase2	-0.05215
3010	precuneus	ab_d_phase2	0.003466
3010	spl	aa_s_phase2	-0.04301
3010	spl	aa_d_phase2	0.2155
3010	spl	ab_s_phase2	-0.1351
3010	spl	ab_d_phase2	-0.02986
3010	dlpfc_acc	aa_s_phase2	0.207
3010	dlpfc_acc	aa_d_phase2	0.3222
3010	dlpfc_acc	ab_s_phase2	-0.03704
3010	dlpfc_acc	ab_d_phase2	0.02239
3011	precuneus	aa_s_phase2	0.1202
3011	precuneus	aa_d_phase2	0.05719
3011	precuneus	ab_s_phase2	0.0507
3011	precuneus	ab_d_phase2	-0.02601
3011	spl	aa_s_phase2	0.04821
3011	spl	aa_d_phase2	0.08742
3011	spl	ab_s_phase2	0.02072
3011	spl	ab_d_phase2	0.02974
3011	dlpfc_acc	aa_s_phase2	0.05914
3011	dlpfc_acc	aa_d_phase2	0.0466
3011	dlpfc_acc	ab_s_phase2	0.02624
3011	dlpfc_acc	ab_d_phase2	0.06735
3012	precuneus	aa_s_phase2	0.07364
3012	precuneus	aa_d_phase2	-0.0357
3012	precuneus	ab_s_phase2	-0.04772
3012	precuneus	ab_d_phase2	0.02253
3012	spl	aa_s_phase2	0.0626
3012	spl	aa_d_phase2	-0.07942
3012	spl	ab_s_phase2	0.02335
3012	spl	ab_d_phase2	-0.0442
3012	dlpfc_acc	aa_s_phase2	0.09354
3012	dlpfc_acc	aa_d_phase2	0.03749
3012	dlpfc_acc	ab_s_phase2	0.0389
3012	dlpfc_acc	ab_d_phase2	0.06926
3013	precuneus	aa_s_phase2	0.03875
3013	precuneus	aa_d_phase2	0.1578
3013	precuneus	ab_s_phase2	0.06548
3013	precuneus	ab_d_phase2	0.02765
3013	spl	aa_s_phase2	0.004863
3013	spl	aa_d_phase2	0.05663
3013	spl	ab_s_phase2	-0.005211
3013	spl	ab_d_phase2	0.04147
3013	dlpfc_acc	aa_s_phase2	-0.09776
3013	dlpfc_acc	aa_d_phase2	0.07117
3013	dlpfc_acc	ab_s_phase2	0.01341
3013	dlpfc_acc	ab_d_phase2	0.1107
3014	precuneus	aa_s_phase2	-0.08576
3014	precuneus	aa_d_phase2	-0.07035
3014	precuneus	ab_s_phase2	-0.0618
3014	precuneus	ab_d_phase2	-0.02632
3014	spl	aa_s_phase2	-0.142
3014	spl	aa_d_phase2	-0.007516
3014	spl	ab_s_phase2	-0.1299
3014	spl	ab_d_phase2	0.01429
3014	dlpfc_acc	aa_s_phase2	-0.009947
3014	dlpfc_acc	aa_d_phase2	0.0213
3014	dlpfc_acc	ab_s_phase2	0.08801
3014	dlpfc_acc	ab_d_phase2	0.1874
3015	precuneus	aa_s_phase2	0.05454
3015	precuneus	aa_d_phase2	-0.08546
3015	precuneus	ab_s_phase2	0.03445
3015	precuneus	ab_d_phase2	0.02543
3015	spl	aa_s_phase2	-0.06961
3015	spl	aa_d_phase2	-0.02357
3015	spl	ab_s_phase2	-0.0867
3015	spl	ab_d_phase2	0.05138
3015	dlpfc_acc	aa_s_phase2	0.08413
3015	dlpfc_acc	aa_d_phase2	0.03746
3015	dlpfc_acc	ab_s_phase2	0.01802
3015	dlpfc_acc	ab_d_phase2	0.1113
3017	precuneus	aa_s_phase2	-0.03238
3017	precuneus	aa_d_phase2	-0.04869
3017	precuneus	ab_s_phase2	-0.04101
3017	precuneus	ab_d_phase2	0.08661
3017	spl	aa_s_phase2	-0.08665
3017	spl	aa_d_phase2	0.004239
3017	spl	ab_s_phase2	-0.09341
3017	spl	ab_d_phase2	0.05577
3017	dlpfc_acc	aa_s_phase2	0.07791
3017	dlpfc_acc	aa_d_phase2	0.05031
3017	dlpfc_acc	ab_s_phase2	0.07269
3017	dlpfc_acc	ab_d_phase2	0.164
3018	precuneus	aa_s_phase2	0.2209
3018	precuneus	aa_d_phase2	0.2612
3018	precuneus	ab_s_phase2	0.04181
3018	precuneus	ab_d_phase2	0.1255
3018	spl	aa_s_phase2	-0.003877
3018	spl	aa_d_phase2	0.2033
3018	spl	ab_s_phase2	-0.1502
3018	spl	ab_d_phase2	0.1073
3018	dlpfc_acc	aa_s_phase2	0.3335
3018	dlpfc_acc	aa_d_phase2	0.2593
3018	dlpfc_acc	ab_s_phase2	0.07596
3018	dlpfc_acc	ab_d_phase2	0.1536
3019	precuneus	aa_s_phase2	-0.05269
3019	precuneus	aa_d_phase2	-0.02337
3019	precuneus	ab_s_phase2	-0.09891
3019	precuneus	ab_d_phase2	0.07879
3019	spl	aa_s_phase2	-0.01528
3019	spl	aa_d_phase2	-0.05914
3019	spl	ab_s_phase2	0.005324
3019	spl	ab_d_phase2	-0.03749
3019	dlpfc_acc	aa_s_phase2	0.1649
3019	dlpfc_acc	aa_d_phase2	0.1567
3019	dlpfc_acc	ab_s_phase2	0.1659
3019	dlpfc_acc	ab_d_phase2	0.2793
3020	precuneus	aa_s_phase2	-0.1549
3020	precuneus	aa_d_phase2	-0.08737
3020	precuneus	ab_s_phase2	-0.1844
3020	precuneus	ab_d_phase2	-0.1575
3020	spl	aa_s_phase2	-0.06615
3020	spl	aa_d_phase2	-0.1257
3020	spl	ab_s_phase2	-0.1574
3020	spl	ab_d_phase2	-0.08705
3020	dlpfc_acc	aa_s_phase2	0.1112
3020	dlpfc_acc	aa_d_phase2	0.0895
3020	dlpfc_acc	ab_s_phase2	-0.01832
3020	dlpfc_acc	ab_d_phase2	0.01586
3021	precuneus	aa_s_phase2	0.09945
3021	precuneus	aa_d_phase2	0.1267
3021	precuneus	ab_s_phase2	-0.05348
3021	precuneus	ab_d_phase2	-0.2259
3021	spl	aa_s_phase2	0.1164
3021	spl	aa_d_phase2	-0.04954
3021	spl	ab_s_phase2	-0.000256
3021	spl	ab_d_phase2	-0.2093
3021	dlpfc_acc	aa_s_phase2	0.1645
3021	dlpfc_acc	aa_d_phase2	0.1375
3021	dlpfc_acc	ab_s_phase2	0.1133
3021	dlpfc_acc	ab_d_phase2	0.005215
3022	precuneus	aa_s_phase2	0.1208
3022	precuneus	aa_d_phase2	0.08163
3022	precuneus	ab_s_phase2	-0.000031
3022	precuneus	ab_d_phase2	0.08837
3022	spl	aa_s_phase2	0.1817
3022	spl	aa_d_phase2	-0.008125
3022	spl	ab_s_phase2	0.2738
3022	spl	ab_d_phase2	-0.3893
3022	dlpfc_acc	aa_s_phase2	-0.08637
3022	dlpfc_acc	aa_d_phase2	0.2175
3022	dlpfc_acc	ab_s_phase2	0.08783
3022	dlpfc_acc	ab_d_phase2	0.1938
3023	precuneus	aa_s_phase2	-0.03647
3023	precuneus	aa_d_phase2	-0.004856
3023	precuneus	ab_s_phase2	0.1321
3023	precuneus	ab_d_phase2	-0.02287
3023	spl	aa_s_phase2	0.03054
3023	spl	aa_d_phase2	-0.06655
3023	spl	ab_s_phase2	0.06517
3023	spl	ab_d_phase2	-0.05414
3023	dlpfc_acc	aa_s_phase2	0.07822
3023	dlpfc_acc	aa_d_phase2	0.1539
3023	dlpfc_acc	ab_s_phase2	0.204
3023	dlpfc_acc	ab_d_phase2	0.1806
3025	precuneus	aa_s_phase2	0.2089
3025	precuneus	aa_d_phase2	0.08831
3025	precuneus	ab_s_phase2	0.09354
3025	precuneus	ab_d_phase2	0.1691
3025	spl	aa_s_phase2	0.03701
3025	spl	aa_d_phase2	0.02548
3025	spl	ab_s_phase2	-0.07714
3025	spl	ab_d_phase2	0.04807
3025	dlpfc_acc	aa_s_phase2	0.124
3025	dlpfc_acc	aa_d_phase2	0.1062
3025	dlpfc_acc	ab_s_phase2	0.0535
3025	dlpfc_acc	ab_d_phase2	0.2201
3026	precuneus	aa_s_phase2	-0.03272
3026	precuneus	aa_d_phase2	0.2258
3026	precuneus	ab_s_phase2	-0.06057
3026	precuneus	ab_d_phase2	-0.006294
3026	spl	aa_s_phase2	-0.03247
3026	spl	aa_d_phase2	0.2243
3026	spl	ab_s_phase2	-0.07394
3026	spl	ab_d_phase2	0.04858
3026	dlpfc_acc	aa_s_phase2	0.09125
3026	dlpfc_acc	aa_d_phase2	0.2745
3026	dlpfc_acc	ab_s_phase2	0.06218
3026	dlpfc_acc	ab_d_phase2	0.1959
3027	precuneus	aa_s_phase2	-0.01904
3027	precuneus	aa_d_phase2	0.03889
3027	precuneus	ab_s_phase2	-0.1676
3027	precuneus	ab_d_phase2	0.04017
3027	spl	aa_s_phase2	0.02031
3027	spl	aa_d_phase2	0.1032
3027	spl	ab_s_phase2	-0.1175
3027	spl	ab_d_phase2	0.08024
3027	dlpfc_acc	aa_s_phase2	0.169
3027	dlpfc_acc	aa_d_phase2	0.1517
3027	dlpfc_acc	ab_s_phase2	-0.01274
3027	dlpfc_acc	ab_d_phase2	0.1604
3028	precuneus	aa_s_phase2	0.1611
3028	precuneus	aa_d_phase2	0.1581
3028	precuneus	ab_s_phase2	0.1761
3028	precuneus	ab_d_phase2	0.008644
3028	spl	aa_s_phase2	0.07337
3028	spl	aa_d_phase2	0.2285
3028	spl	ab_s_phase2	0.02807
3028	spl	ab_d_phase2	0.1479
3028	dlpfc_acc	aa_s_phase2	0.1102
3028	dlpfc_acc	aa_d_phase2	0.2284
3028	dlpfc_acc	ab_s_phase2	0.2177
3028	dlpfc_acc	ab_d_phase2	0.2561
3029	precuneus	aa_s_phase2	0.182
3029	precuneus	aa_d_phase2	0.0465
3029	precuneus	ab_s_phase2	0.02026
3029	precuneus	ab_d_phase2	0.09768
3029	spl	aa_s_phase2	-0.02198
3029	spl	aa_d_phase2	-0.009457
3029	spl	ab_s_phase2	-0.121
3029	spl	ab_d_phase2	0.002209
3029	dlpfc_acc	aa_s_phase2	0.2075
3029	dlpfc_acc	aa_d_phase2	0.1052
3029	dlpfc_acc	ab_s_phase2	0.1478
3029	dlpfc_acc	ab_d_phase2	0.1398
3034	precuneus	aa_s_phase2	0.1672
3034	precuneus	aa_d_phase2	0.06396
3034	precuneus	ab_s_phase2	-0.1018
3034	precuneus	ab_d_phase2	-0.003095
3034	spl	aa_s_phase2	0.1418
3034	spl	aa_d_phase2	-0.04256
3034	spl	ab_s_phase2	-0.04888
3034	spl	ab_d_phase2	-0.1459
3034	dlpfc_acc	aa_s_phase2	0.3621
3034	dlpfc_acc	aa_d_phase2	0.1387
3034	dlpfc_acc	ab_s_phase2	0.08426
3034	dlpfc_acc	ab_d_phase2	0.2023
3035	precuneus	aa_s_phase2	-0.0866
3035	precuneus	aa_d_phase2	-0.1457
3035	precuneus	ab_s_phase2	0.1383
3035	precuneus	ab_d_phase2	-0.01958
3035	spl	aa_s_phase2	0.1802
3035	spl	aa_d_phase2	-0.04221
3035	spl	ab_s_phase2	0.1826
3035	spl	ab_d_phase2	0.04823
3035	dlpfc_acc	aa_s_phase2	0.04883
3035	dlpfc_acc	aa_d_phase2	-0.104
3035	dlpfc_acc	ab_s_phase2	0.1369
3035	dlpfc_acc	ab_d_phase2	0.1433
3040	precuneus	aa_s_phase2	0.2373
3040	precuneus	aa_d_phase2	0.3188
3040	precuneus	ab_s_phase2	0.2002
3040	precuneus	ab_d_phase2	0.144
3040	spl	aa_s_phase2	0.0627
3040	spl	aa_d_phase2	0.158
3040	spl	ab_s_phase2	0.04697
3040	spl	ab_d_phase2	0.02611
3040	dlpfc_acc	aa_s_phase2	0.1584
3040	dlpfc_acc	aa_d_phase2	0.2094
3040	dlpfc_acc	ab_s_phase2	0.1682
3040	dlpfc_acc	ab_d_phase2	0.2646
3101	precuneus	aa_s_phase2	0.07858
3101	precuneus	aa_d_phase2	0.1212
3101	precuneus	ab_s_phase2	0.1063
3101	precuneus	ab_d_phase2	0.1778
3101	spl	aa_s_phase2	-0.07704
3101	spl	aa_d_phase2	-0.0857
3101	spl	ab_s_phase2	-0.1159
3101	spl	ab_d_phase2	0.08349
3101	dlpfc_acc	aa_s_phase2	-0.02437
3101	dlpfc_acc	aa_d_phase2	-0.005213
3101	dlpfc_acc	ab_s_phase2	-0.02932
3101	dlpfc_acc	ab_d_phase2	0.08595
3102	precuneus	aa_s_phase2	0.2485
3102	precuneus	aa_d_phase2	0.266
3102	precuneus	ab_s_phase2	0.172
3102	precuneus	ab_d_phase2	0.1823
3102	spl	aa_s_phase2	0.006439
3102	spl	aa_d_phase2	0.1235
3102	spl	ab_s_phase2	-0.02851
3102	spl	ab_d_phase2	0.04646
3102	dlpfc_acc	aa_s_phase2	0.1989
3102	dlpfc_acc	aa_d_phase2	0.2193
3102	dlpfc_acc	ab_s_phase2	0.153
3102	dlpfc_acc	ab_d_phase2	0.1608
3103	precuneus	aa_s_phase2	0.06983
3103	precuneus	aa_d_phase2	0.1262
3103	precuneus	ab_s_phase2	-0.1107
3103	precuneus	ab_d_phase2	0.09121
3103	spl	aa_s_phase2	-0.002643
3103	spl	aa_d_phase2	0.1267
3103	spl	ab_s_phase2	-0.08467
3103	spl	ab_d_phase2	0.09071
3103	dlpfc_acc	aa_s_phase2	0.109
3103	dlpfc_acc	aa_d_phase2	0.06199
3103	dlpfc_acc	ab_s_phase2	0.04566
3103	dlpfc_acc	ab_d_phase2	0.09154
3104	precuneus	aa_s_phase2	0.199
3104	precuneus	aa_d_phase2	0.1343
3104	precuneus	ab_s_phase2	0.132
3104	precuneus	ab_d_phase2	-0.06942
3104	spl	aa_s_phase2	-0.01656
3104	spl	aa_d_phase2	0.0559
3104	spl	ab_s_phase2	-0.03693
3104	spl	ab_d_phase2	0.04276
3104	dlpfc_acc	aa_s_phase2	0.1075
3104	dlpfc_acc	aa_d_phase2	0.1791
3104	dlpfc_acc	ab_s_phase2	0.1397
3104	dlpfc_acc	ab_d_phase2	0.2145
3105	precuneus	aa_s_phase2	-0.02141
3105	precuneus	aa_d_phase2	0.0615
3105	precuneus	ab_s_phase2	0.06576
3105	precuneus	ab_d_phase2	0.1138
3105	spl	aa_s_phase2	-0.06429
3105	spl	aa_d_phase2	0.05478
3105	spl	ab_s_phase2	-0.03154
3105	spl	ab_d_phase2	0.09154
3105	dlpfc_acc	aa_s_phase2	-0.06742
3105	dlpfc_acc	aa_d_phase2	0.03432
3105	dlpfc_acc	ab_s_phase2	0.01518
3105	dlpfc_acc	ab_d_phase2	0.08036
3201	precuneus	aa_s_phase2	0.0613
3201	precuneus	aa_d_phase2	0.179
3201	precuneus	ab_s_phase2	0.01632
3201	precuneus	ab_d_phase2	0.04716
3201	spl	aa_s_phase2	-0.02534
3201	spl	aa_d_phase2	0.1036
3201	spl	ab_s_phase2	-0.08531
3201	spl	ab_d_phase2	0.04114
3201	dlpfc_acc	aa_s_phase2	0.1023
3201	dlpfc_acc	aa_d_phase2	0.1175
3201	dlpfc_acc	ab_s_phase2	0.09922
3201	dlpfc_acc	ab_d_phase2	0.1177
3007	ains	aa_d_phase2	0.009232
3008	ains	aa_d_phase2	-0.027725
3010	ains	aa_d_phase2	0.38765
3011	ains	aa_d_phase2	0.026959
3012	ains	aa_d_phase2	0.0184
3013	ains	aa_d_phase2	0.092695
3014	ains	aa_d_phase2	0.017876
3015	ains	aa_d_phase2	0.0501
3017	ains	aa_d_phase2	0.017522
3018	ains	aa_d_phase2	0.15485
3019	ains	aa_d_phase2	0.1509
3020	ains	aa_d_phase2	0.02571
3021	ains	aa_d_phase2	0.16305
3022	ains	aa_d_phase2	-0.116645
3023	ains	aa_d_phase2	0.2572
3025	ains	aa_d_phase2	0.039255
3026	ains	aa_d_phase2	0.22545
3027	ains	aa_d_phase2	0.095665
3028	ains	aa_d_phase2	0.127
3029	ains	aa_d_phase2	0.1421
3034	ains	aa_d_phase2	0.007201
3035	ains	aa_d_phase2	-0.2232
3040	ains	aa_d_phase2	0.1474
3101	ains	aa_d_phase2	-0.04803
3102	ains	aa_d_phase2	0.1538
3103	ains	aa_d_phase2	-0.021435
3104	ains	aa_d_phase2	0.06611
3105	ains	aa_d_phase2	-0.02474
3201	ains	aa_d_phase2	0.090945
3007	ains	aa_s_phase2	0.026375
3008	ains	aa_s_phase2	0.043525
3010	ains	aa_s_phase2	0.081545
3011	ains	aa_s_phase2	0.004435
3012	ains	aa_s_phase2	0.063565
3013	ains	aa_s_phase2	0.06335
3014	ains	aa_s_phase2	-0.0318435
3015	ains	aa_s_phase2	0.077765
3017	ains	aa_s_phase2	0.0149425
3018	ains	aa_s_phase2	0.2485
3019	ains	aa_s_phase2	0.098835
3020	ains	aa_s_phase2	0.04365
3021	ains	aa_s_phase2	0.104975
3022	ains	aa_s_phase2	0.06859
3023	ains	aa_s_phase2	0.14815
3025	ains	aa_s_phase2	0.091145
3026	ains	aa_s_phase2	0.047375
3027	ains	aa_s_phase2	0.03953
3028	ains	aa_s_phase2	0.021305
3029	ains	aa_s_phase2	0.1806
3034	ains	aa_s_phase2	0.1327
3035	ains	aa_s_phase2	0.09288
3040	ains	aa_s_phase2	0.132
3101	ains	aa_s_phase2	-0.03728
3102	ains	aa_s_phase2	0.15265
3103	ains	aa_s_phase2	-0.023585
3104	ains	aa_s_phase2	0.083865
3105	ains	aa_s_phase2	-0.1422
3201	ains	aa_s_phase2	0.051955
3007	ains	ab_d_phase2	0.023951
3008	ains	ab_d_phase2	0.20165
3010	ains	ab_d_phase2	-0.03448
3011	ains	ab_d_phase2	0.1029
3012	ains	ab_d_phase2	0.063615
3013	ains	ab_d_phase2	0.10386
3014	ains	ab_d_phase2	0.111865
3015	ains	ab_d_phase2	0.1387
3017	ains	ab_d_phase2	0.05385
3018	ains	ab_d_phase2	0.10046
3019	ains	ab_d_phase2	0.20535
3020	ains	ab_d_phase2	-0.050445
3021	ains	ab_d_phase2	-0.06876
3022	ains	ab_d_phase2	0.027262
3023	ains	ab_d_phase2	0.2633
3025	ains	ab_d_phase2	0.1726
3026	ains	ab_d_phase2	0.199
3027	ains	ab_d_phase2	0.1199
3028	ains	ab_d_phase2	0.1362
3029	ains	ab_d_phase2	0.1331
3034	ains	ab_d_phase2	0.077285
3035	ains	ab_d_phase2	0.07274
3040	ains	ab_d_phase2	0.21425
3101	ains	ab_d_phase2	0.11071
3102	ains	ab_d_phase2	0.07399
3103	ains	ab_d_phase2	0.001891
3104	ains	ab_d_phase2	0.104365
3105	ains	ab_d_phase2	-0.003813
3201	ains	ab_d_phase2	0.055725
3007	ains	ab_s_phase2	0.014694
3008	ains	ab_s_phase2	0.20075
3010	ains	ab_s_phase2	-0.041574
3011	ains	ab_s_phase2	-0.0323715
3012	ains	ab_s_phase2	0.04527
3013	ains	ab_s_phase2	0.0143345
3014	ains	ab_s_phase2	0.01891
3015	ains	ab_s_phase2	0.039065
3017	ains	ab_s_phase2	0.018414
3018	ains	ab_s_phase2	0.037565
3019	ains	ab_s_phase2	0.022064
3020	ains	ab_s_phase2	-0.05924
3021	ains	ab_s_phase2	0.065365
3022	ains	ab_s_phase2	0.040845
3023	ains	ab_s_phase2	0.14595
3025	ains	ab_s_phase2	0.03944
3026	ains	ab_s_phase2	-0.0094695
3027	ains	ab_s_phase2	-0.00074
3028	ains	ab_s_phase2	0.090465
3029	ains	ab_s_phase2	0.12365
3034	ains	ab_s_phase2	0.0251535
3035	ains	ab_s_phase2	0.1126
3040	ains	ab_s_phase2	0.06399
3101	ains	ab_s_phase2	-0.04365
3102	ains	ab_s_phase2	0.08565
3103	ains	ab_s_phase2	-0.047745
3104	ains	ab_s_phase2	0.03878
3105	ains	ab_s_phase2	-0.047465
3201	ains	ab_s_phase2	0.09657
